# Supplementary material for: Global Deletome Profile of Saccharomyces cerevisiae Exposed to the Technology-Critical Element Yttrium
Source: Front Microbiol. 2018 Sep 4;9:2005. doi: 10.3389/fmicb.2018.02005 (PMC6131306; doi:10.3389/fmicb.2018.02005)
Supplement: Supplementary file 3 [file Table_3.XLSX]

## Sheet: Supp Table 3
Supplementary Table 3 – GO terms of biological pathways involved in yttrium toxicity modulation. f is the total number of genes in each category and k is the number of mutants found in this study, for each GO term.
GO terms		All mutants			Resistant mutants			Sensitive mutants
	f	p-value	k	Mutants	p-value	k	Mutants	p-value	k	Mutants
PROTEIN TRANSPORT
transport [GO:0006810]	815	7.12e-06	68	FLC2 AAC3 VID24 STP22 YCR023C VAM6 GET3 DHH1 VPS54 SAC3 VPS64 VPS74 NHX1 VPS52 VPS60 YPT31 BST1 GET1 MON1 COG1 VMA7 ACB1 TPC1 MVB12 MAL11 VMA16 SMF2 EGD2 FLX1 VPS35 RCY1 MOG1 VPS25 DID4 ATP7 VPS24 LTV1 LST4 VPS51 DID2 TRK2 SNF7 SRN2 PEP3 VTA1 ARV1 SEC22 VPS36 ATR1 STV1 SAM37 VPS20 PEP5 SCS7 MON2 FPK1 TLG2 THP1 YOL162W VPS5 INP53 VPS17 SNF8 VPS28 BRO1 VPS30 VPS4 OPT2	0.000255	54	FLC2 AAC3 VID24 STP22 YCR023C VAM6 GET3 SAC3 VPS64 NHX1 VPS60 YPT31 BST1 GET1 MON1 ACB1 TPC1 MVB12 MAL11 EGD2 FLX1 VPS35 MOG1 VPS25 DID4 ATP7 VPS24 DID2 TRK2 SNF7 SRN2 VTA1 ARV1 SEC22 VPS36 ATR1 STV1 SAM37 VPS20 PEP5 SCS7 MON2 FPK1 THP1 YOL162W VPS5 INP53 VPS17 SNF8 VPS28 BRO1 VPS30 VPS4 OPT2	0.00479	14	DHH1 VPS54 VPS74 VPS52 COG1 VMA7 VMA16 SMF2 RCY1 LTV1 LST4 VPS51 PEP3 TLG2
protein transport [GO:0015031]	379	2.55e-08	45	VID24 STP22 VAM6 VPS54 VPS64 VPS74 VPS52 VPS60 YPT31 BST1 MON1 COG1 MVB12 EGD2 VPS35 RCY1 MOG1 VPS25 DID4 VPS24 APL2 LTV1 LST4 VPS51 DID2 SNF7 SRN2 PEP3 VTA1 SEC22 VPS36 SAM37 VPS20 PEP5 MON2 TLG2 VPS5 INP53 VPS17 SNF8 VPS28 BRO1 VPS30 VPS4 OPT2	1.39e-05	34	VID24 STP22 VAM6 VPS64 VPS60 YPT31 BST1 MON1 MVB12 EGD2 VPS35 MOG1 VPS25 DID4 VPS24 DID2 SNF7 SRN2 VTA1 SEC22 VPS36 SAM37 VPS20 PEP5 MON2 VPS5 INP53 VPS17 SNF8 VPS28 BRO1 VPS30 VPS4 OPT2	0.000197	11	VPS54 VPS74 VPS52 COG1 RCY1 APL2 LTV1 LST4 VPS51 PEP3 TLG2
retrograde transport, endosome to Golgi [GO:0042147]	18	1.38e-05	7	VPS54 VPS52 VPS35 VPS51 VPS5 VPS17 VPS30	0.0056	4	VPS35 VPS5 VPS17 VPS30	0.000387	3	VPS54 VPS52 VPS51
protein targeting to vacuole [GO:0006623]	41	3.18e-11	16	VID24 STP22 VPS64 MON1 MVB12 VPS25 VPS1 VPS51 DID2 SRN2 VPS36 VPS9 MON2 VPS27 SNF8 VPS28	4.16e-10	14	VID24 STP22 VPS64 MON1 MVB12 VPS25 DID2 SRN2 VPS36 VPS9 MON2 VPS27 SNF8 VPS28	NS	-	-
late endosome to vacuole transport [GO:0045324]	20	1.63e-11	12	STP22 DID4 VPS24 DID2 SNF7 PEP3 VTA1 VPS20 PEP5 VPS27 VPS30 VPS4	6.21e-11	11	STP22 DID4 VPS24 DID2 SNF7 VTA1 VPS20 PEP5 VPS27 VPS30 VPS4	NS	-	-
protein deubiquitination [GO:0016579]	19	0.00192	5	DOA4 UBP3 UBP6 UBP2 BRO1	0.000854	5	DOA4 UBP3 UBP6 UBP2 BRO1	NS	-	-
ubiquitin-dependent protein catabolic process via the multivesicular body sorting pathway [GO:0043162]	15	7.22e-14	12	STP22 DOA4 VPS25 DID4 VPS24 SNF7 SRN2 VPS36 VPS20 UBP2 SNF8 VPS28	1e-14	12	STP22 DOA4 VPS25 DID4 VPS24 SNF7 SRN2 VPS36 VPS20 UBP2 SNF8 VPS28	NS	-	-
protein targeting to membrane [GO:0006612]	15	0.00528	4	STP22 AKR1 SRN2 VPS28	0.00275	4	STP22 AKR1 SRN2 VPS28	NS	-	-
late endosome to vacuole transport via multivesicular body sorting pathway [GO:0032511]	12	0.00215	4	VPS60 DID2 VTA1 VPS4	0.0011	4	VPS60 DID2 VTA1 VPS4	NS	-	-
protein retention in Golgi apparatus [GO:0045053]	11	1.95e-07	7	VPS35 DID4 VPS1 VPS36 VPS27 VPS5 VPS4	1.87e-06	6	VPS35 DID4 VPS36 VPS27 VPS5 VPS4	NS	-	-
intralumenal vesicle formation [GO:0070676]	5	2.94e-07	5	DID4 VPS24 SNF7 VPS20 VPS4	1.19e-07	5	DID4 VPS24 SNF7 VPS20 VPS4	NS	-	-
vacuole fusion, non-autophagic [GO:0042144]	29	0.00258	6	VAM6 VAM7 PEP3 PEP5 VAM10 OPT2	0.00621	5	VAM6 VAM7 PEP5 VAM10 OPT2	NS	-	-
protein insertion into ER membrane [GO:0045048]	5	0.00113	3	GET3 GET1 MDY2	0.000664	3	GET3 GET1 MDY2	NS	-	-
ubiquitin-dependent protein catabolic process [GO:0006511]	69	NS	-	-	0.00738	8	DOA4 SEM1 UBP3 UBP6 DEF1 DOA1 UBP2 BRO1	NS	-	-
Golgi to vacuole transport [GO:0006896]	24	NS	-	-	NS	-	-	3.76e-05	4	VPS54 VPS52 APL2 TLG2
intracellular protein transport [GO:0006886]	90	NS	-	-	NS	-	-	0.000786	5	CDC50 APL2 LST4 PEP3 TLG2
endoplasmic reticulum unfolded protein response [GO:0030968]	13	NS	-	-	NS	-	-	0.00483	2	VPS74 BCK1
protein localization in Golgi apparatus [GO:0034067]	1	NS	-	-	NS	-	-	0.00818	1	VPS74
FAD transport [GO:0015883]	4	NS	-	-	0.00974	2	FLC2 FLX1	NS	-	-
ENDOCYTOSIS AND CYTOSKELETON
endocytosis [GO:0006897]	82	4.29e-05	14	SLA1 CDC50 DOA4 YCK1 RCY1 VPS1 ENT4 ENT2 VRP1 SIW14 END3 MON2 TLG2 INP53	0.00195	10	SLA1 DOA4 YCK1 ENT4 ENT2 VRP1 SIW14 END3 MON2 INP53	0.00436	4	CDC50 RCY1 VPS1 TLG2
actin filament organization [GO:0007015]	43	0.00107	8	TPD3 SLA1 ENT4 ENT2 VRP1 ARC18 SIW14 END3	0.000324	8	TPD3 SLA1 ENT4 ENT2 VRP1 ARC18 SIW14 END3	NS	-	-
actin cytoskeleton organization [GO:0030036]	34	0.00118	7	BEM2 GRX4 VPS1 VRP1 SSK2 SLG1 SHE4	0.00244	6	BEM2 GRX4 VRP1 SSK2 SLG1 SHE4	NS	-	-
actin cortical patch assembly [GO:0000147]	14	0.00402	4	SLA1 ENT4 ENT2 END3	0.00209	4	SLA1 ENT4 ENT2 END3	NS	-	-
microtubule cytoskeleton organization [GO:0000226]	9	0.00816	3	ATS1 BEM2 RBL2	0.00493	3	ATS1 BEM2 RBL2	NS	-	-
positive regulation of endocytosis [GO:0045807]	6	0.00217	3	FKS1 ROM2 SLG1	0.00129	3	FKS1 ROM2 SLG1	NS	-	-
actin filament-based process [GO:0030029]	3	0.00714	2	SAC3 VPS52	NS	-	-	NS	-	-
LIPID BIOSYNTHETIC PROCESS
lipid biosynthetic process [GO:0008610]	52	0.000913	9	FEN1 SUR2 CAX4 OAR1 ERG3 SUR4 ERG2 SCS7 ERG24	0.000245	9	FEN1 SUR2 CAX4 OAR1 ERG3 SUR4 ERG2 SCS7 ERG24	NS	-	-
fatty acid biosynthetic process [GO:0006633]	22	0.000544	6	FEN1 SUR2 OAR1 ERG3 SUR4 SCS7	0.000205	6	FEN1 SUR2 OAR1 ERG3 SUR4 SCS7	NS	-	-
sphingolipid biosynthetic process [GO:0030148]	15	0.000583	5	TSC3 FEN1 LCB3 SUR4 SUR1	0.00275	4	TSC3 FEN1 LCB3 SUR4	NS	-	-
sphingolipid metabolic process [GO:0006665]	11	0.000106	5	DPL1 SUR2 LCB3 ARV1 SCS7	4.46e-05	5	DPL1 SUR2 LCB3 ARV1 SCS7	NS	-	-
fatty acid elongation [GO:0030497]	3	0.00714	2	FEN1 SUR4	0.00501	2	FEN1 SUR4	NS	-	-
glycosphingolipid biosynthetic process [GO:0006688]	3	0.00714	2	CSG2 SUR1	NS	-	-	0.000196	2	CSG2 SUR1
mannosyl-inositol phosphorylceramide metabolic process [GO:0006675]	3	0.00714	2	TLG2 SUR1	NS	-	-	0.000196	2	TLG2 SUR1
SIGNALING - STRESS RESPONSE - CELL CYCLE
pheromone-dependent signal transduction involved in conjugation with cellular fusion [GO:0000750]	28	4.41e-05	8	STE50 PTC1 GET3 MFA1 FAR1 STE18 ARV1 STE4	1.19e-05	8	STE50 PTC1 GET3 MFA1 FAR1 STE18 ARV1 STE4	NS	-	-
protein autophosphorylation [GO:0046777]	10	0.000989	4	ELM1 HSL1 SSK2 FPK1	0.0005	4	ELM1 HSL1 SSK2 FPK1	NS	-	-
heterotrimeric G-protein complex cycle [GO:0031684]	3	0.00714	2	STE18 STE4	0.00501	2	STE18 STE4	NS	-	-
regulation of TOR signaling cascade [GO:0032006]	2	0.00246	2	NPR2 NPR3	0.00172	2	NPR2 NPR3	NS	-	-
transcription-coupled nucleotide-excision repair [GO:0006283]	12	0.000174	5	SAC3 RPB9 DEF1 THO2 THP1	0.0011	4	SAC3 DEF1 THO2 THP1	NS	-	-
cellular response to phosphate starvation [GO:0016036]	4	0.000468	3	NPP1 PHM8 PHO4	0.00974	2	NPP1 PHM8	NS	-	-
cell communication [GO:0007154]	15	0.00528	4	BEM1 VAM7 VPS5 VPS17	0.00275	4	BEM1 VAM7 VPS5 VPS17	NS	-	-
cellular response to amino acid starvation [GO:0034198]	2	0.00246	2	NPR2 NPR3	0.00172	2	NPR2 NPR3	NS	-	-
response to aluminum ion [GO:0010044]	2	0.00246	2	YGL140C URE2	0.00172	2	YGL140C URE2	NS	-	-
cell morphogenesis involved in conjugation with cellular fusion [GO:0000753]	13	0.00299	4	BEM1 DHH1 HUB1 MDY2	NS	-	-	NS	-	-
response to nutrient [GO:0007584]	2	0.00246	2	BCK1 BRO1	NS	-	-	NS	-	-
potassium ion transmembrane transport [GO:0071805]	4	NS	-	-	0.00974	2	NHX1 TRK2	NS	-	-
septin checkpoint [GO:0000135]	4	NS	-	-	0.00974	2	ELM1 HSL1	NS	-	-
REGULATION OF BIOLOGICAL PROCESS
regulation of cell size [GO:0008361]	30	0.000529	7	YCR061W HXK2 VPS51 FKS1 SFP1 SKY1 WHI3	0.0072	5	YCR061W HXK2 FKS1 SKY1 WHI3	NS	-	-
negative regulation of transcription from RNA polymerase II promoter by glucose [GO:0000433]	7	0.00366	3	VPS25 VPS36 SNF8	0.00218	3	VPS25 VPS36 SNF8	NS	-	-
negative regulation of transcription from RNA polymerase II promoter [GO:0000122]	57	0.00668	8	SRB8 ARG82 RPH1 RME1 SSN8 SKO1 SIN3 PHO85	NS	-	-	NS	-	-
regulation of SNARE complex assembly [GO:0035542]	6	0.00217	3	VAM6 PEP3 PEP5	NS	-	-	NS	-	-
negative regulation of chromatin silencing at telomere [GO:0031939]	11	NS	-	-	0.0091	3	SDS3 PHO23 SIN3	NS	-	-
regulation of transcription from RNA polymerase III promoter [GO:0006359]	4	NS	-	-	0.00974	2	CKB1 CKA2	NS	-	-
positive regulation of transcription by galactose [GO:0000411]	4	NS	-	-	0.00974	2	SRB8 SSN8	NS	-	-
positive regulation of histone ubiquitination [GO:0033184]	1	NS	-	-	NS	-	-	0.00818	1	BUR2
regulation of arginine metabolic process [GO:0000821]	1	NS	-	-	NS	-	-	0.00818	1	ARG82
ION HOMEOSTASIS
vacuolar acidification [GO:0007035]	26	0.00814	5	NHX1 VMA7 VMA16 VMA22 STV1	NS	-	-	0.00118	3	VMA7 VMA16 VMA22
vacuolar proton-transporting V-type ATPase complex assembly [GO:0070072]	4	NS	-	-	NS	-	-	0.00039	2	VMA21 VMA22
ATP hydrolysis coupled proton transport [GO:0015991]	17	NS	-	-	NS	-	-	0.00825	2	VMA7 VMA16
GROWTH
filamentous growth [GO:0030447]	17	0.0085	4	SEM1 VPS60 KEM1 GAS1	0.0045	4	SEM1 VPS60 KEM1 GAS1	NS	-	-
budding cell bud growth [GO:0007117]	18	NS	-	-	0.0056	4	TPD3 ATS1 BEM2 ELM1	NS	-	-
